# Supplementary material
Source: PubMed Central journal article supplement (PMC3738064)
Supplement: NIHMS486180-supplement-01.pdf [file NIHMS486180-supplement-01.pdf]

**Online Table I. Activation and Signaling Pathways of Human Platelets Mediate Both Hemostasis and Inflammation<sup>1-17</sup>**

| <b>Agonist(s) or Ligand(s)</b>                                                                               | <b>Surface Receptor(s)</b>                                              | <b>Receptor Class</b>             | <b>Hemostatic Activities</b>                                                                                                                                                  | <b>Inflammatory Activities</b>                                                                                                                                                                                                                                                       |
|--------------------------------------------------------------------------------------------------------------|-------------------------------------------------------------------------|-----------------------------------|-------------------------------------------------------------------------------------------------------------------------------------------------------------------------------|--------------------------------------------------------------------------------------------------------------------------------------------------------------------------------------------------------------------------------------------------------------------------------------|
| Thrombin; Synthetic thrombin receptor activating peptides (TRAPs); Matrix metalloproteinase 1; <u>others</u> | Protease-activated receptors (PAR1, PAR4 in humans; PAR3, PAR4 in mice) | G Protein-Coupled Receptor (GPCR) | Inside-out signaling of integrin $\alpha_{IIb}\beta_3$ ; fibrinogen binding; aggregation; degranulation; clot retraction; TXA <sub>2</sub> synthesis; tissue factor synthesis | Release of chemokines and antibacterial peptides; surface translocation of P-selectin; synthesis of IL-1 $\beta$ and tissue factor; formation of platelet-leukocyte aggregates; triggering of platelet-dependent leukocyte signaling; altered surface display of toll-like receptors |
| ADP                                                                                                          | P2Y receptors (P2Y <sub>1</sub> , P2Y <sub>12</sub> )                   | GPCR                              | Triggering, amplification of platelet aggregation; stabilization of platelet aggregates; TXA <sub>2</sub> synthesis; degranulation                                            | Formation of platelet-leukocyte aggregates; synthesis of IL-1 $\beta$                                                                                                                                                                                                                |
| Thromboxane A <sub>2</sub> (TXA <sub>2</sub> ; stable TXA <sub>2</sub> mimetics)                             | TXA <sub>2</sub> receptor                                               | GPCR                              | $\alpha_{IIb}\beta_3$ activation; fibrinogen binding; aggregation; adhesion; potentiation of thrombin signaling                                                               | Synthesis of IL-1 $\beta$ ; release of CD40L                                                                                                                                                                                                                                         |

|                                                                               |                                                                                                                                                                                 |                |                                                                                                                                                                                                                                                                                                                                                                         |                                                                                                                                                                           |
|-------------------------------------------------------------------------------|---------------------------------------------------------------------------------------------------------------------------------------------------------------------------------|----------------|-------------------------------------------------------------------------------------------------------------------------------------------------------------------------------------------------------------------------------------------------------------------------------------------------------------------------------------------------------------------------|---------------------------------------------------------------------------------------------------------------------------------------------------------------------------|
| Platelet-activating factor (PAF); PAF-like oxidatively modified phospholipids | PAF receptor (PAFR)<br>(Human but not mouse platelets express PAFR)                                                                                                             | GPCR           | Weak agonist for aggregation, adhesion; synergistic amplification of platelet activation by thrombin, ADP                                                                                                                                                                                                                                                               | Potent agonist for formation of platelet-neutrophil and platelet-monocyte aggregates; IL-1 $\beta$ synthesis                                                              |
| Collagen                                                                      | GPVI<br>(Collagen is also recognized by integrin $\alpha_2\beta_1$ on platelets)                                                                                                | Immunoreceptor | Association with GPIb-IX-V; activation of $\alpha_{IIb}\beta_3$ ; degranulation; release of inorganic polyphosphates (PolyP) with procoagulant and proinflammatory actions                                                                                                                                                                                              | Synthesis of IL-1 $\beta$ (not yet known if this is mediated by GPVI, integrin $\alpha_2\beta_1$ , or both); shedding of proinflammatory microparticles; release of PolyP |
| Fibrinogen (Fg)                                                               | Integrin $\alpha_{IIb}\beta_3$ (integrin $\alpha_{IIb}\beta_3$ also binds other ligands, including fibrin, fibronectin, von Willebrand factor, vitronectin, and thrombospondin) | Integrin       | Outside-in signaling triggering or contributing to: tight platelet adhesion and spreading on extracellular matrix; TXA <sub>2</sub> synthesis; fibrin clot stabilization and retraction; generation of platelet procoagulant activity and microparticles; degranulation; synergistic signaling with thrombin, other agonists; signaling to translation control pathways | Degranulation; amplification of signal-dependent translation                                                                                                              |

This list of agonist – and receptor-mediated hemostatic and inflammatory activities and responses is illustrative and not comprehensive. Additional examples, and details of intracellular pathways and mechanisms, are included in the supplemental references. Other inflammatory activities of platelets induced by pathways or agonists that trigger primary hemostatic responses are likely to be discovered.

**Online Table II. Functional Responses of Human and Mouse Platelets Induced by LPS In Vitro**<sup>18-28</sup>

| Platelet Preparation                                                                  | LPS                                       | Functional Response(s)                                                                                                      | Reference |
|---------------------------------------------------------------------------------------|-------------------------------------------|-----------------------------------------------------------------------------------------------------------------------------|-----------|
| Washed human platelets                                                                | <i>S. minn.</i> R595,<br>10-250 µg/mL     | Potential of serotonin release induced by IgG aggregates or immune complexes                                                | 18        |
| Human PRP                                                                             | <i>E. coli</i> 0111:B4,<br>1-100 ng/mL    | <u>Did not</u> directly induce or potentiate aggregation triggered by ADP, epinephrine (epi), or arachidonic acid (AA)      | 19        |
| Human whole blood                                                                     | <i>E. coli</i> 0111:B34,<br>0.1-100 ng/mL | Potentiated aggregation triggered by ADP, epi, AA; primed platelet-PMN aggregate formation; primed PAF synthesis            | 19        |
| Human platelet rich plasma (PRP)                                                      | <i>E. coli</i> 0111:B4,<br>≤10 ng/mL      | <u>Did not</u> directly induce aggregation or P-selectin translocation, or potentiate these responses to ADP, PAF, collagen | 20        |
| Gel filtered mouse platelets in buffer <del>or</del> <u>with</u> 10% autologous serum | <i>E. coli</i> 0111:B4,<br>5 µg/mL        | <u>Did not</u> induce P-selectin translocation (30 min); induced adhesion of platelets to immobilized fibrinogen under flow | 21        |

4/25/13

|                                                           |                                                                                                                  |                                                                                                                                                                                                                                                                                                                                                               |    |
|-----------------------------------------------------------|------------------------------------------------------------------------------------------------------------------|---------------------------------------------------------------------------------------------------------------------------------------------------------------------------------------------------------------------------------------------------------------------------------------------------------------------------------------------------------------|----|
| Human PRP or washed human platelets                       | Several <i>E. coli</i> LPS types; 1 µg/mL diluted in plasma                                                      | PAC-1 binding; CD40L upregulation; binding of fibrinogen; adhesion to cultured microvascular endothelial cells ( <u>no</u> adhesion of washed platelets)                                                                                                                                                                                                      | 22 |
| Isolated human platelets in Hank's Balanced Salt Solution | <i>E. coli</i> 0111:B4, 5-100 µg/mL                                                                              | <u>Did not</u> induce platelet aggregation (~5 min) or P-selectin expression: induced attachment of platelets to neutrophils immobilized on protein-coated coverslips under flow; induced neutrophil extracellular trap (NET) formation and neutrophil degranulation                                                                                          | 23 |
| Human platelets isolated by negative immunoselection; PRP | <i>E. coli</i> 0111:B4, <del>10 ng</del> <u>1 µg</u> <del>100 ng</del> /mL in 0.5% serum or recombinant CD14+LBP | <u>Did not</u> directly induce rapid shape change or aggregation; augmented rapid (5 min) ADP-induced aggregation in PRP; induced time-dependent actin polymerization, P-selectin translocation, P-selectin-dependent platelet-neutrophil interaction, CD40L upregulation (1-3 hr); time-dependent splicing of <i>IL-1β</i> pre-mRNA, IL-1β protein synthesis | 24 |

4/25/13

|                                                      |                                                   |                                                                                                                                                                                                                                           |    |
|------------------------------------------------------|---------------------------------------------------|-------------------------------------------------------------------------------------------------------------------------------------------------------------------------------------------------------------------------------------------|----|
| Washed human platelets or PRP                        | Several different LPS types;<br>(1-100 µg/mL)     | Did not induce rapid aggregation of washed platelets but potentiated aggregation of platelets stimulated with subthreshold concentrations of thrombin, collagen; directly induced ADP release (10 min), P-selectin translocation (30 min) | 25 |
| Washed mouse platelets                               | <i>E. coli</i> 0111:B4,<br>10 µg/mL               | Potentiated thrombin-induced aggregation, secretion                                                                                                                                                                                       | 25 |
| Human platelets isolated by negative immunoselection | <i>E. coli</i> 0111:B4,<br>100 ng/mL + rCD14, LBP | Shedding of microparticles; splicing of <i>IL-1β</i> pre-mRNA, synthesis of IL-1β protein; signaling of cultured endothelial cells                                                                                                        | 26 |
| Human platelets isolated by negative immunoselection | <i>E. coli</i> 0111:B4,<br>10 ng/mL – 1 µg/mL     | <u>Did not</u> induce P-selectin translocation (60 min); induced splicing of <i>tissue factor</i> (TF) pre-mRNA and generation of TF procoagulant activity (30 min – 4 hr)                                                                | 27 |
| <u>Human PRP</u>                                     | <u>LPS from <i>S. typhimurium</i>, 1 µg/mL</u>    | <u>Did not induce thrombin generation. In contrast, histones triggered platelet activation and thrombin generation that were partially blocked by anti-TLR4 antibody.</u>                                                                 | 28 |

See main text and cited references for additional details

**Online Table III. Activated Human Platelets Have Diverse Mechanisms for Release or Surface Display of Inflammatory Factors**<sup>1-3, 16, 29-32</sup>

| <b>Inflammatory Factor</b>     | <b>Mechanism of Release or Surface Display</b>        | <b>Inflammatory Activities</b>                                                                                                                                                                                                                                                                  |
|--------------------------------|-------------------------------------------------------|-------------------------------------------------------------------------------------------------------------------------------------------------------------------------------------------------------------------------------------------------------------------------------------------------|
| TxA <sub>2</sub>               | Rapid synthesis and paracrine release                 | See Table 1                                                                                                                                                                                                                                                                                     |
| PAF                            | Rapid synthesis; retained on platelet plasma membrane | See Table 1                                                                                                                                                                                                                                                                                     |
| Fibrinogen                     | Degranulation (alpha granules) and secretion          | See Table 1                                                                                                                                                                                                                                                                                     |
| Platelet factor 4 (PF4; CXCL4) | Degranulation (alpha granules) and secretion          | Chemotactic for neutrophils, monocytes; promotes monocyte survival and differentiation to macrophages; heterodimerization with RANTES to promote monocyte recruitment to endothelium; T-cell and monocyte trafficking, cytokine production in experimental cerebral malaria; plasmodium killing |
| RANTES (CCL5)                  | Degranulation (alpha granules) and secretion          | Chemotactic for eosinophils ; signaling of monocyte inflammatory gene expression; recruitment of T-cells to endothelium; heterodimerization with PF4 with recruitment of monocytes to endothelium                                                                                               |

|                                  |                                                                                            |                                                                                                                                                                                                                                         |
|----------------------------------|--------------------------------------------------------------------------------------------|-----------------------------------------------------------------------------------------------------------------------------------------------------------------------------------------------------------------------------------------|
| P-selectin                       | Translocation to platelet plasma membrane from alpha granules                              | Binding to P-selectin glycoprotein 1 (PSGL-1) on neutrophils, monocytes, lymphocytes, and dendritic cells, mediating platelet-leukocyte interactions; signaling of gene expression and other responses of leukocytes by engaging PSGL-1 |
| Serotonin                        | Degranulation (dense granules) and secretion                                               | Modulation of endothelial barrier function; activates monocytes and prevents monocyte apoptosis; accessory signal for T-cells; alters T-cell trafficking                                                                                |
| Inorganic Polyphosphates (PolyP) | Degranulation (dense granules) and release                                                 | PolyP trigger bradykinin generation in plasma and bradykinin-dependent increased capillary permeability, plasma leakage, and edema                                                                                                      |
| ADP                              | Degranulation (dense granules) and secretion                                               | Alterations in endothelial barrier function; modulation of monocyte activation, apoptosis; accessory signaling of T-cell activation                                                                                                     |
| Human $\beta$ -defensin 1        | Release from novel cytoplasmic compartment in response to <i>S. aureus</i> $\alpha$ -toxin | Induction of neutrophil extracellular trap formation; bacterial killing                                                                                                                                                                 |
| TLR9                             | Translocation from novel cytoplasmic compartment                                           | Signaling and platelet activation if engaged by bacterial, viral DNA or other microbial factors                                                                                                                                         |

|                                       |                                                                                                                                                                        |                                                                                                                                                                                                                |
|---------------------------------------|------------------------------------------------------------------------------------------------------------------------------------------------------------------------|----------------------------------------------------------------------------------------------------------------------------------------------------------------------------------------------------------------|
| CD40 ligand (CD40L; CD154)            | CD40L present on plasma membrane and in subcellular compartment(s) in basal state; cleavage of transmembrane CD40L at plasma membranes of activated platelets, release | Signaling of lymphocytes, monocytes, endothelial cells, platelets via CD40; adaptive immune responses; immune amplification                                                                                    |
| Interleukin 1 $\beta$ (IL-1 $\beta$ ) | Signal-dependent pre-mRNA splicing and mRNA translation; translocation to plasma membranes of activated platelets; release in microvesicles and in soluble form        | Activation of endothelial cells resulting in adhesion molecule and chemokine expression; induction of vascular smooth muscle cell cytokine production; triggering of chemokine release by synovial fibroblasts |

Additional details regarding mechanisms and inflammatory activities of these platelet factors are included in the main text and cited references. This is an abbreviated list, and represents only a small fraction of the factors released or displayed by activated platelets.



**Online Table IV. Examples of Signal Dependent Translation by Human Platelets that Yields Proteins with Relevance to Thrombosis and Inflammation**<sup>1, 2, 12, 27, 33-44</sup>

| <b>mRNA or Pre-mRNA Transcript</b> | <b>Mechanisms of Signal-Dependent Translation</b>                                                                                                         | <b>Protein Product</b>                          | <b>Functional Response(s)</b>                                                                                                                                                                     |
|------------------------------------|-----------------------------------------------------------------------------------------------------------------------------------------------------------|-------------------------------------------------|---------------------------------------------------------------------------------------------------------------------------------------------------------------------------------------------------|
| <i>Bcl-3</i>                       | Translation of constitutive mRNA in activated platelets controlled by mammalian target of rapamycin (mTOR)                                                | B cell lymphoma 3 (Bcl-3)                       | Clot retraction <u>in vitro</u>                                                                                                                                                                   |
| <i>PAI-1</i>                       | Basal expression that is enhanced by thrombin-stimulated translation of <i>PAI-1</i> mRNA                                                                 | Plasminogen activator inhibitor-1 (PAI-1)       | Release of PAI-1; association with tissue plasminogen activator <u>in vitro</u>                                                                                                                   |
| <i>IL-1<math>\beta</math></i>      | Signal-dependent splicing of pre-mRNA in activated platelets controlled by cdc-like Kinase 1 (CLK1); translation of the mature, processed mRNA transcript | IL-1 $\beta$                                    | Release of IL-1 $\beta$ in microparticles, solution; endothelial signaling <u>in vitro</u> (Platelet-derived IL-1 $\beta$ is reported to have inflammatory activities <u>in vivo</u> . See text.) |
| <i>TF</i>                          | Same as for <i>IL-1<math>\beta</math></i>                                                                                                                 | Tissue factor (TF)                              | Release of TF in microparticles; clot time shortening <u>in vitro</u>                                                                                                                             |
| <i>TIMP-2</i>                      | Translation of constitutive mRNA by activated platelets                                                                                                   | Tissue inhibitor of metalloproteinase 2 (TIMP2) | Time-dependent secretion of TIMP2 <u>in vitro</u> ; Functional activity not tested                                                                                                                |

Experiments involving metabolic labeling of newly-synthesized proteins with radiolabeled amino acids and separation of the products by electrophoresis indicate that multiple proteins are produced when human platelets are activated under appropriate conditions. Many of these products are not yet identified, but others in addition to those on this list have been reported<sup>36, 40, 44</sup>. Also see main text and references.

**Online Table V. Platelet Activities in Selected Inflammatory Vasculopathies****Syndrome, Disorder, or Disease Involving Vascular Inflammation**Sepsis<sup>1-3, 23, 27, 45-73</sup>**Platelet Activities in Clinical Studies and/or Experimental Models**

Platelet activation may be ubiquitous in clinical sepsis. Platelet-fibrin thrombi and platelet sequestration in microvessels are central manifestations. Thrombocytopenia (multifactorial) is common and is a prognostic feature. Disseminated intravascular coagulation (DIC) occurs. Microbial factors (LPS, other TLR ligands) and host factors generated in sepsis (thrombin, PAF, others) can directly activate platelets (see Supplemental Tables 1 and 2). Reported platelet activities include: variable aggregation, adhesion, secretion depending on the clinical study; formation of platelet-neutrophil and platelet-monocyte aggregates; enhancement of adhesion of neutrophil aggregates to human endothelium *in vitro*; expression of *tissue factor* mRNA and tissue factor activity by platelets from septic subjects. Plasma from septic patients induces binding of platelets to neutrophils and NET formation *in vitro*, consistent with triggering of NET formation by LPS-stimulated platelets (Table 2). Platelet-neutrophil binding induced by plasma from septic subjects was blocked by an inhibitor that interrupts binding of MD2 to TLR4. Recent observations indicate that platelet-monocyte aggregates correlate with negative outcomes in elderly patients with sepsis (Rondina M, et al, manuscript submitted). Studies of controlled challenge of human volunteers with LPS are consistent with activation of platelets in sepsis. Mouse and other animal models are generally consistent with clinical studies of human platelets in sepsis, and indicate that platelets mediate microvascular thrombosis, NET formation, increased endothelial permeability, and lymphoid apoptosis.

Malaria<sup>1, 2, 31, 32, 74-90</sup>

Thrombocytopenia is common in human malaria caused by *Plasmodium falciparum*, *P. vivax*, and *P. knowlesi*. Inflammatory vasculopathy is a feature of severe malaria, which includes cerebral and pulmonary malaria and multiple organ failure. Cytoadherence (“sequestration”) of parasitized red blood cells (PRBC) and accumulation of platelets and leukocytes – particularly monocytes – with generation of cytokines, dysregulation of hemostasis, and endothelial barrier disruption are thought to contribute to the vasculopathy. Platelets sequestered in microvessels in contact with leukocytes, PRBC, and a hemoglobin-derived malarial toxin (hemozoin) have been observed in autopsy specimens. Platelets bind to PRBC and form aggregates in vitro; this “clumping” is associated with severe malaria. Platelets act as cellular bridges between PRBC and activated human endothelial cells in vitro. PRBC (*P. falciparum*) activate human platelets in vitro, inducing binding of PAC-1 antibody, surface translocation of P-selectin, PF4 release. PF4 has been detected in plasma samples from patients infected with *P. falciparum*; few other studies of patient samples have been reported. Mouse models of severe malaria have controversial features, but generally support the idea that platelets contribute to malarial vasculopathy as immune effectors. While there is evidence that platelets contribute to vascular inflammation in severe malaria they may be protective and have anti-parasite activities early in the infection.

Dengue<sup>1, 2, 91-102</sup>

Severe thrombocytopenia, dysregulated coagulation, bleeding, capillary leak, systemic inflammation with increased plasma cytokines, and/or systemic hypoperfusion occur in some patients, resulting in syndromes that have been called dengue hemorrhagic fever and dengue shock syndrome. Platelet-monocyte and platelet-neutrophil aggregates form in the blood of patients and non-human primates infected with dengue. In vitro experiments indicate that the dengue flavivirus directly infects human platelets but precise contributions of platelets to vasculopathy and vascular instability in severe dengue syndromes are under investigation.

Acute Lung Injury (ALI) and Acute Respiratory Distress Syndrome (ARDS)<sup>1-3, 103-119</sup>

Increased pulmonary capillary permeability and diffuse alveolar inflammation are hallmarks of ALI/ARDS, which are common causes of critical illness. Systemic vascular involvement and multiple organ failure are frequent complications. Sepsis is a common precipitating condition. (Also see text and Supplemental Table 2.) Platelets, leukocytes, and fibrin accumulate in lung microvessels in patients with ALI/ARDS based on imaging and autopsy studies. Clinical observations and experimental models indicate that platelets contribute to disrupted alveolar capillary barrier function, alveolar edema, sequestration of neutrophils and monocytes in pulmonary vessels, microvascular thrombosis, and alveolar inflammation. See also Transfusion-related ALI, below.

Transfusion-related Acute Lung Injury (TRALI)<sup>1, 2, 104, 107, 120-126</sup>

TRALI is a particular syndrome of ALI/ARDS that occurs within hours of transfusion of blood products, including platelets. LPS and platelets or platelet products trigger ALI in “two hit” animal models. CD40L in stored human blood products may prime neutrophils for endothelial injury based on *in vitro* studies. Platelets and neutrophils are sequestered and NETs form in lungs of mice with TRALI induced by challenge with an MHC antibody after LPS priming; targeting platelet activation with aspirin or inhibitors of integrin  $\alpha_{IIb}\beta_3$  reduces accumulation of NETs in alveolar vessels, accumulation of NET-associated platelets, lung edema, and pulmonary vascular permeability in this model.  $\text{TxA}_2$  (see Supplemental Table 1) mediates increased permeability of LPS-primed endothelial cells challenged with NETs *in vitro*.

Deep Vein Thrombosis (DVT)<sup>127-139</sup>

DVT and its complications, including pulmonary thromboembolism (PTE), are common vascular disorders. Inflammatory syndromes and neoplasia are frequent precipitating conditions. DVT and PTE are usually acute or subacute conditions, but chronic sequelae including post-phlebotic syndrome and chronic thromboembolic pulmonary hypertension also occur. A variety of clinical and experimental observations indicate that DVT has inflammatory components and may in many cases contribute to inflammatory vasculopathy and that platelets are involved. Activated platelets, platelet-leukocyte aggregates, and platelet microparticles have been detected in the blood of patients with DVT, venous stasis ulceration, and/or chronic thromboembolic pulmonary hypertension. Animal models demonstrate the inflammatory nature of clots and critical contributions by platelets, and that platelets and leukocytes act together to promote coagulation. A recently-described mouse model indicates that interactions between platelets, monocytes, and neutrophils together with tissue factor synthesis and NET formation drive venous thrombosis. Clinical studies utilizing radiolabeled

fluorodeoxyglucose and positron emission tomography (PET) imaging demonstrate that clots in DVT are metabolically active, consistent with active contributions by inflammatory effector cells.

#### Sickle Cell Disease Vasculopathy and Vaso-Occlusion<sup>123, 140-148</sup>

Sickle cell vasculopathy has inflammatory components and involves accumulation of myeloid leukocytes and platelets in vessels, in addition to sickled erythrocytes. Activated endothelial cells can recruit adherent leukocytes in murine models of this disease; the leukocytes can then secondarily capture erythrocytes and platelets, leading to vascular occlusion. Mice in a sickle cell disease model have increased pulmonary and systemic inflammatory responses to LPS. Platelet-neutrophil aggregate formation mediated by P-selectin occurs in mice in a sickle cell model and patients with sickle cell disease; hypoxia and reoxygenation induces additional platelet-neutrophil aggregates to form and parallel activation of both platelets and neutrophils. The platelet transcriptome is altered in human sickle cell disease, resulting in changes in the arginine metabolic pathway.

#### Rheumatoid Vasculopathies and Vasculitis<sup>1-3, 149-158</sup>

Clinical and experimental evidence indicates that local, regional, and in some cases systemic vasculopathies are key features of rheumatic diseases. Triggers for vascular inflammation in rheumatic syndromes alter vessels in an organ – and syndrome – specific fashion. Many rheumatic syndromes are associated with increased frequency of DVT and/or accelerated atherogenesis and complications of atherosclerosis. Circulating activated platelets and markers of platelet activation have been detected in blood samples from patients with several rheumatic conditions. The platelet transcriptome is altered in patients with systemic lupus erythematosus (SLE), and alterations in Type 1 interferon-regulated genes and proteins are associated with development of vascular disease. Platelet-derived CD40L may be a key immune modulator in SLE. In a study with relevance to progressive systemic sclerosis involving patient samples and rodent models, platelet-derived serotonin was reported to link vascular

disease and tissue fibrosis. Platelets likely contribute to a variety of syndromes of microangiopathy, vasculitis, and inflammation-induced thrombosis, but many are incompletely studied because they are relatively uncommon.

#### Transplant Vasculopathies<sup>159-163</sup>

Platelets contribute to the pathogenesis of transplant vasculopathy and may be involved in acute organ rejection and chronic allograft vasculopathy. Platelets and fibrin in vessels were reported in tissue from patients with hyperacute and acute rejections, and platelet aggregates were observed in capillaries in antibody-mediated and cell-mediated renal transplant rejection in clinical studies.

Interactions of platelets with monocytes, B and T lymphocytes, and dendritic cells may be involved, depending on the specific syndrome and time after transplantation. Experimental observations indicate that platelet-endothelial interactions dependent on complement occur, and that platelets recruit leukocytes to areas of alloantibody deposition and mediate sustained leukocyte-endothelial interactions in vivo. In a murine model, human platelet-derived CD40L induced endothelial activation and acute rejection of cardiac allografts. In a porcine-primate renal xenotransplant model, platelet-leukocyte aggregates formed, platelet aggregates and fibrin were detected in kidney vessels, and expression of tissue factor by recipient platelets triggered consumptive coagulopathy.

#### Atherosclerosis and Predisposing Conditions<sup>2, 3, 5, 14, 164-178</sup>

Atherosclerosis is a chronic inflammatory vasculopathy. Contributions of platelets to initiation and progression of atherosclerotic lesions and to atherothrombotic complications are well-known and have been extensively reviewed. Emerging evidence indicates that platelets may link inflammation and progressive vascular involvement in predisposing conditions that include diabetes, obesity, and smoking.

Acute Coronary Syndromes (ACS), Coronary Intervention, Reperfusion  
Vasculopathy<sup>2, 5, 9, 166, 179-191</sup>

Platelets are key effector cells in coronary thrombosis resulting from atherosclerotic plaque rupture, a pivotal vascular event that precipitates myocardial infarction and other ACS. Inflammatory and hemostatic activities of platelets contribute to atherothrombotic sequelae. Megakaryocytes and platelets are reported to be hyperactive in ACS. Circulating platelet-monocyte aggregates are an early marker of acute myocardial infarction, and are a sensitive index of platelet activation in experimental and clinical ACS and coronary intervention. Platelets also bind to and interact with neutrophils in ACS. Platelet-leukocyte interactions can induce cytokine expression in ACS, and can mediate systemic inflammation in these disorders. Platelet expression of the transcript for myeloid-related protein-14 may be a novel signature that identifies acute coronary events. Integrin  $\alpha_{IIb}\beta_3$  is involved in platelet-leukocyte interactions and surface of expression of leukocyte integrins in ACS. Beneficial effects of anti-platelet therapies, which are central interventions in the management of these complications of atherosclerosis, may result from interruption of inflammatory activities of platelets in addition to inhibition of coronary thrombosis. Platelets also have key activities in iatrogenic vasculopathy after interventions to open obstructed coronary vessels such as angioplasty and stenting; platelets accumulate rapidly after coronary angioplasty or stent placement and bind leukocytes. Platelets are central in the pathogenesis of restenosis together with leukocytes and vascular wall cells. Platelets also contribute to reperfusion injury after coronary intervention and following cardiopulmonary bypass. These contributions likely involving inflammatory activities of these cells.



Cerebrovascular Disease and Stroke<sup>9, 192-206</sup>

Platelet activation likely contributes in a variety of ways to vascular inflammation, thrombus formation, and vascular occlusion in cerebrovascular disease, and to thromboinflammatory amplification in cerebral ischemia and stroke. Analysis of clinical samples indicates that platelets are activated in patients with acute, subacute, and remote cerebrovascular ischemia and intracerebral hemorrhage. Platelet activation and platelet-leukocyte interactions occur and may be critical in acute stroke preceded by infection. Platelet-monocyte aggregates form in cerebrovascular disease, and *in vitro* experiments indicate that interaction of platelets, monocytes, and exposed collagen can induce metalloproteinase expression at sites of cerebrovascular plaque rupture. Platelet induced metalloproteinases, cytokines that are induced by platelet-monocyte interactions such as monocyte chemoattractant protein 1, and CD40L-CD40 may be key molecular effectors and pathways that can be modified by targeted intervention in both platelets and leukocytes. The blood transcriptome is altered in stroke, potentially reflecting changes in the platelet transcriptome in part. Increased formation of platelet-monocyte aggregates and CD40L levels were associated with worsened outcomes after ischemic stroke in a recent report.

Atherosclerotic Peripheral Arterial Disease<sup>207, 208</sup>

Contributions of platelets to peripheral vascular diseases have been recently reviewed. Altered platelet reactivity has been detected in a large number of clinical studies, with indices and assays including enhanced responses to thrombin, ADP, or collagen; spontaneous platelet aggregation; circulating platelet-leukocyte aggregates; and basal P-selectin display and/or activation of integrin  $\alpha_{IIb}\beta_3$ . Some studies include patients with diabetes or other predisposing conditions.

Thromboangiitis Obliterans<sup>209-214</sup>

Thromboangiitis obliterans (TAO), or Buerger's Disease, is an uncommon inflammatory vasculopathy of arteries and veins linked to smoking that usually affects young adults and is a cause of amputation and other morbidities. Small studies suggest that platelet activation and shedding of platelet microparticles are associated with exacerbation of TAO. Analogs of prostacyclin – a major inhibitor of platelet activation – are beneficial in management of TAO. Platelet activation and platelet-leukocyte aggregation mediated by PAF-like oxidized lipids occur in experimental animals subjected to cigarette smoke, suggesting potential mechanisms to drive vascular inflammation in TAO. Human cigarette smokers were reported to have increased CD40L on platelets, increased plasma CD40L, and circulating platelet-monocyte aggregates. Nevertheless, individual mechanistic contributions of platelets and leukocytes are not yet defined in this vasculopathy.

## Supplemental References

1. Vieira-de-Abreu A, Campbell RA, Weyrich AS, Zimmerman GA. Platelets: Versatile effector cells in hemostasis, inflammation, and the immune continuum. *Seminars in immunopathology*. 2012;34:5-30.
2. Vieira-de-Abreu A, Rondina MT, Weyrich AS, Zimmerman GA. Platelets in disease: Inflammation. In: Michelson A, ed. *Platelets, 3rd edition*. London: Elsevier; 2013: 733-766.
3. Smyth SS, McEver RP, Weyrich AS, Morrell CN, Hoffman MR, Arepally GM, French PA, Dauerman HL, Becker RC. Platelet functions beyond hemostasis. *Journal of thrombosis and haemostasis : JTH*. 2009;7:1759-1766.
4. Freedman JE. Molecular regulation of platelet-dependent thrombosis. *Circulation*. 2005;112:2725-2734.
5. Davi G, Patrono C. Platelet activation and atherothrombosis. *N Engl J Med*. 2007;357:2482-2494.
6. Kasirer-Friede A, Kahn ML, Shattil SJ. Platelet integrins and immunoreceptors. *Immunol Rev*. 2007;218:247-264.
7. Smyth SS, Woulfe DS, Weitz JI, Gachet C, Conley PB, Goodman SG, Roe MT, Kuliopulos A, Moliterno DJ, French PA, Steinhubl SR, Becker RC. G-protein-coupled receptors as signaling targets for antiplatelet therapy. *Arteriosclerosis, thrombosis, and vascular biology*. 2009;29:449-457.
8. Michelson AD. Antiplatelet therapies for the treatment of cardiovascular disease. *Nature reviews. Drug discovery*. 2010;9:154-169.
9. Nieswandt B, Pleines I, Bender M. Platelet adhesion and activation mechanisms in arterial thrombosis and ischaemic stroke. *Journal of thrombosis and haemostasis : JTH*. 2011;9 Suppl 1:92-104.
10. Haimovich B, Lipfert L, Brugge JS, Shattil SJ. Tyrosine phosphorylation and cytoskeletal reorganization in platelets are triggered by interaction of integrin receptors with their immobilized ligands. *J Biol Chem*. 1993;268:15868-15877.
11. Stephens G, O'Lunaigh N, Reilly D, Harriott P, Walker B, Fitzgerald D, Moran N. A sequence within the cytoplasmic tail of gpiib independently activates platelet aggregation and thromboxane synthesis. *J Biol Chem*. 1998;273:20317-20322.
12. Pabla R, Weyrich AS, Dixon DA, Bray PF, McIntyre TM, Prescott SM, Zimmerman GA. Integrin-dependent control of translation: Engagement of integrin alphaIIb beta3 regulates synthesis of proteins in activated human platelets. *J Cell Biol*. 1999;144:175-184.
13. Trivedi V, Boire A, Tchernychev B, Kaneider NC, Leger AJ, O'Callaghan K, Covic L, Kuliopulos A. Platelet matrix metalloprotease-1 mediates thrombogenesis by activating par1 at a cryptic ligand site. *Cell*. 2009;137:332-343.
14. Chen R, Chen X, Salomon RG, McIntyre TM. Platelet activation by low concentrations of intact oxidized ldl particles involves the paf receptor. *Arteriosclerosis, thrombosis, and vascular biology*. 2009;29:363-371.
15. Takizawa H, Nishimura S, Takayama N, Oda A, Nishikii H, Morita Y, Kakinuma S, Yamazaki S, Okamura S, Tamura N, Goto S, Sawaguchi A, Manabe I, Takatsu K, Nakauchi H, Takaki S, Eto K. Lnk regulates integrin alphaIIb beta3 outside-in signaling in mouse platelets, leading to stabilization of thrombus development in vivo. *J Clin Invest*. 2010;120:179-190.
16. Muller F, Mutch NJ, Schenk WA, Smith SA, Esterl L, Spronk HM, Schmidbauer S, Gahl WA, Morrissey JH, Renne T. Platelet polyphosphates are proinflammatory and procoagulant mediators in vivo. *Cell*. 2009;139:1143-1156.

17. Rowley JW, Oler AJ, Tolley ND, Hunter BN, Low EN, Nix DA, Yost CC, Zimmerman GA, Weyrich AS. Genome-wide rna-seq analysis of human and mouse platelet transcriptomes. *Blood*. 2011;118:e101-111.
18. Ginsberg MH, Henson PM. Enhancement of platelet response to immune complexes and igg aggregates by lipid a-rich bacterial lipopolysaccharides. *J Exp Med*. 1978;147:207-217.
19. Montrucchio G, Bosco O, Del Sorbo L, Fascio Pecetto P, Lupia E, Goffi A, Omede P, Emanuelli G, Camussi G. Mechanisms of the priming effect of low doses of lipopoly-saccharides on leukocyte-dependent platelet aggregation in whole blood. *Thrombosis and haemostasis*. 2003;90:872-881.
20. Ward JR, Bingle L, Judge HM, Brown SB, Storey RF, Whyte MK, Dower SK, Buttler DJ, Sabroe I. Agonists of toll-like receptor (tlr)2 and tlr4 are unable to modulate platelet activation by adenosine diphosphate and platelet activating factor. *Thrombosis and haemostasis*. 2005;94:831-838.
21. Andonegui G, Kerfoot SM, McNagny K, Ebbert KV, Patel KD, Kubes P. Platelets express functional toll-like receptor-4. *Blood*. 2005;106:2417-2423.
22. Stahl AL, Svensson M, Morgelin M, Svanborg C, Tarr PI, Mooney JC, Watkins SL, Johnson R, Karpman D. Lipopolysaccharide from enterohemorrhagic escherichia coli binds to platelets through tlr4 and cd62 and is detected on circulating platelets in patients with hemolytic uremic syndrome. *Blood*. 2006;108:167-176.
23. Clark SR, Ma AC, Tavener SA, McDonald B, Goodarzi Z, Kelly MM, Patel KD, Chakrabarti S, McAvoy E, Sinclair GD, Keys EM, Allen-Vercoe E, Devinney R, Doig CJ, Green FH, Kubes P. Platelet tlr4 activates neutrophil extracellular traps to ensnare bacteria in septic blood. *Nat Med*. 2007;13:463-469.
24. Shashkin PN, Brown GT, Ghosh A, Marathe GK, McIntyre TM. Lipopolysaccharide is a direct agonist for platelet rna splicing. *J Immunol*. 2008;181:3495-3502.
25. Zhang G, Han J, Welch EJ, Ye RD, Voyno-Yasenetskaya TA, Malik AB, Du X, Li Z. Lipopolysaccharide stimulates platelet secretion and potentiates platelet aggregation via tlr4/myd88 and the cgmp-dependent protein kinase pathway. *J Immunol*. 2009;182:7997-8004.
26. Brown GT, McIntyre TM. Lipopolysaccharide signaling without a nucleus: Kinase cascades stimulate platelet shedding of proinflammatory il-1beta-rich microparticles. *J Immunol*. 2011;186:5489-5496.
27. Rondina MT, Schwertz H, Harris ES, Kraemer BF, Campbell RA, Mackman N, Grissom CK, Weyrich AS, Zimmerman GA. The septic milieu triggers expression of spliced tissue factor mrna in human platelets. *Journal of thrombosis and haemostasis : JTH*. 2011;9:748-758.
28. Semeraro F, Ammollo CT, Morrissey JH, Dale GL, Friese P, Esmon NL, Esmon CT. Extracellular histones promote thrombin generation through platelet-dependent mechanisms: Involvement of platelet tlr2 and tlr4. *Blood*. 2011;118:1952-1961.
29. Kraemer BF, Campbell RA, Schwertz H, Cody MJ, Franks Z, Tolley ND, Kahr WH, Lindemann S, Seizer P, Yost CC, Zimmerman GA, Weyrich AS. Novel anti-bacterial activities of beta-defensin 1 in human platelets: Suppression of pathogen growth and signaling of neutrophil extracellular trap formation. *PLoS pathogens*. 2011;7:e1002355.
30. Thon JN, Peters CG, Machlus KR, Aslam R, Rowley J, Macleod H, Devine MT, Fuchs TA, Weyrich AS, Semple JW, Flaumenhaft R, Italiano JE, Jr. T granules in human platelets function in tlr9 organization and signaling. *J Cell Biol*. 2012;198:561-574.
31. McMorrnan BJ, Wieczorski L, Drysdale KE, Chan JA, Huang HM, Smith C, Mitiku C, Beeson JG, Burgio G, Foote SJ. Platelet factor 4 and duffy antigen required for platelet killing of plasmodium falciparum. *Science*. 2012;338:1348-1351.
32. Love MS, Millholland MG, Mishra S, Kulkarni S, Freeman KB, Pan W, Kavash RW, Costanzo MJ, Jo H, Daly TM, Williams DR, Kowalska MA, Bergman LW, Poncz M, Degrado WF, Sinnis P, Scott RW,

- Greenbaum DC. Platelet factor 4 activity against *p. Falciparum* and its translation to nonpeptidic mimics as antimalarials. *Cell host & microbe*. 2012;12:815-823.
33. Weyrich AS, Dixon DA, Pabla R, Elstad MR, McIntyre TM, Prescott SM, Zimmerman GA. Signal-dependent translation of a regulatory protein, bcl-3, in activated human platelets. *Proc Natl Acad Sci U S A*. 1998;95:5556-5561.
  34. Lindemann S, Tolley ND, Dixon DA, McIntyre TM, Prescott SM, Zimmerman GA, Weyrich AS. Activated platelets mediate inflammatory signaling by regulated interleukin 1beta synthesis. *J Cell Biol*. 2001;154:485-490.
  35. Brogren H, Karlsson L, Andersson M, Wang L, Erlinge D, Jern S. Platelets synthesize large amounts of active plasminogen activator inhibitor 1. *Blood*. 2004;104:3943-3948.
  36. Denis MM, Tolley ND, Bunting M, Schwertz H, Jiang H, Lindemann S, Yost CC, Rubner FJ, Albertine KH, Swoboda KJ, Fratto CM, Tolley E, Kraiss LW, McIntyre TM, Zimmerman GA, Weyrich AS. Escaping the nuclear confines: Signal-dependent pre-mrna splicing in anucleate platelets. *Cell*. 2005;122:379-391.
  37. Schwertz H, Tolley ND, Foulks JM, Denis MM, Risenmay BW, Buerke M, Tilley RE, Rondina MT, Harris EM, Kraiss LW, Mackman N, Zimmerman GA, Weyrich AS. Signal-dependent splicing of tissue factor pre-mrna modulates the thrombogenicity of human platelets. *J Exp Med*. 2006;203:2433-2440.
  38. Weyrich AS, Denis MM, Schwertz H, Tolley ND, Foulks J, Spencer E, Kraiss LW, Albertine KH, McIntyre TM, Zimmerman GA. Mtor-dependent synthesis of bcl-3 controls the retraction of fibrin clots by activated human platelets. *Blood*. 2007;109:1975-1983.
  39. Qian K, Xie F, Gibson AW, Edberg JC, Kimberly RP, Wu J. Functional expression of iga receptor fcalphari on human platelets. *J Leukoc Biol*. 2008;84:1492-1500.
  40. Zimmerman GA, Weyrich AS. Signal-dependent protein synthesis by activated platelets: New pathways to altered phenotype and function. *Arteriosclerosis, thrombosis, and vascular biology*. 2008;28:s17-24.
  41. Gerrits AJ, Koekman CA, van Haeften TW, Akkerman JW. Platelet tissue factor synthesis in type 2 diabetic patients is resistant to inhibition by insulin. *Diabetes*. 2010;59:1487-1495.
  42. Cecchetti L, Tolley ND, Michetti N, Bury L, Weyrich AS, Gesele P. Megakaryocytes differentially sort mrnas for matrix metalloproteinases and their inhibitors into platelets: A mechanism for regulating synthetic events. *Blood*. 2011;118:1903-1911.
  43. Rowley JW, Schwertz H, Weyrich AS. Platelet mrna: The meaning behind the message. *Curr Opin Hematol*. 2012;19:385-391.
  44. Smith MC, Schwertz H, Zimmerman GA, Weyrich AS. The platelet proteome. In: Michelson A, ed. *Platelets, 3rd edition*. London: Elsevier; 2013: 103-116.
  45. Vincent JL, Yagushi A, Pradier O. Platelet function in sepsis. *Crit Care Med*. 2002;30:S313-317.
  46. Aird WC. The hematologic system as a marker of organ dysfunction in sepsis. *Mayo Clinic proceedings*. *Mayo Clinic*. 2003;78:869-881.
  47. Warkentin TE, Aird WC, Rand JH. Platelet-endothelial interactions: Sepsis, hit, and antiphospholipid syndrome. *Hematology / the Education Program of the American Society of Hematology*. *American Society of Hematology. Education Program*. 2003:497-519.
  48. Harris ES, Rondina MT, Schwertz H, Weyrich AS, Zimmerman GA. Pathogenesis of sepsis and sepsis-induced acute lung injury. In: Choi AMK, ed. *Acute respiratory distress syndrome, 2nd edition*. New York, London: Informa Healthcare; 2010: 369-419.
  49. Semple JW, Freedman J. Platelets and innate immunity. *Cellular and molecular life sciences : CMLS*. 2010;67:499-511.
  50. Yost CC, Weyrich AS, Zimmerman GA. The platelet activating factor (paf) signaling cascade in systemic inflammatory responses. *Biochimie*. 2010;92:692-697.

51. Li Z, Yang F, Dunn S, Gross AK, Smyth SS. Platelets as immune mediators: Their role in host defense responses and sepsis. *Thrombosis research*. 2011;127:184-188.
52. Smith TL, Weyrich AS. Platelets as central mediators of systemic inflammatory responses. *Thrombosis research*. 2011;127:391-394.
53. Goldenberg NM, Steinberg BE, Slutsky AS, Lee WL. Broken barriers: A new take on sepsis pathogenesis. *Science translational medicine*. 2011;3:88ps25.
54. Moreau D, Timsit JF, Vesin A, Garrouste-Orgeas M, de Lassence A, Zahar JR, Adrie C, Vincent F, Cohen Y, Schlemmer B, Azoulay E. Platelet count decline: An early prognostic marker in critically ill patients with prolonged icu stays. *Chest*. 2007;131:1735-1741.
55. Francois B, Trimoreau F, Vignon P, Fixe P, Praloran V, Gastinne H. Thrombocytopenia in the sepsis syndrome: Role of hemophagocytosis and macrophage colony-stimulating factor. *The American journal of medicine*. 1997;103:114-120.
56. Evans G, Lewis AF, Mustard JF. The role of platelet aggregation in the development of endotoxin shock. *The British journal of surgery*. 1969;56:624.
57. Cowan DH, Bowman LS, Fratianne RB, Ahmed F. Platelet aggregation as a sign of septicemia in thermal injury. A prospective study. *JAMA : the journal of the American Medical Association*. 1976;235:1230-1234.
58. Kirschenbaum LA, McKeivitt D, Rullan M, Reisbeck B, Fujii T, Astiz ME. Importance of platelets and fibrinogen in neutrophil-endothelial cell interactions in septic shock. *Crit Care Med*. 2004;32:1904-1909.
59. Ma AC, Kubes P. Platelets, neutrophils, and neutrophil extracellular traps (nets) in sepsis. *Journal of thrombosis and haemostasis : JTH*. 2008;6:415-420.
60. Borissoff JI, ten Cate H. From neutrophil extracellular traps release to thrombosis: An overshooting host-defense mechanism? *Journal of thrombosis and haemostasis : JTH*. 2011;9:1791-1794.
61. Mavrommatis AC, Theodoridis T, Orfanidou A, Roussos C, Christopoulou-Kokkinou V, Zakynthinos S. Coagulation system and platelets are fully activated in uncomplicated sepsis. *Crit Care Med*. 2000;28:451-457.
62. Lorenz R, Brauer M. Platelet factor 4 (pf4) in septicaemia. *Infection*. 1988;16:273-276.
63. Gawaz M, Fateh-Moghadam S, Pilz G, Gurland HJ, Werdan K. Severity of multiple organ failure (mof) but not of sepsis correlates with irreversible platelet degranulation. *Infection*. 1995;23:16-23.
64. Gawaz M, Dickfeld T, Bogner C, Fateh-Moghadam S, Neumann FJ. Platelet function in septic multiple organ dysfunction syndrome. *Intensive care medicine*. 1997;23:379-385.
65. Russwurm S, Vickers J, Meier-Hellmann A, Spangenberg P, Bredle D, Reinhart K, Losche W. Platelet and leukocyte activation correlate with the severity of septic organ dysfunction. *Shock*. 2002;17:263-268.
66. Yaguchi A, Lobo FL, Vincent JL, Pradier O. Platelet function in sepsis. *Journal of thrombosis and haemostasis : JTH*. 2004;2:2096-2102.
67. Inwald DP, Faust SN, Lister P, Peters MJ, Levin M, Heyderman R, Klein NJ. Platelet and soluble cd40l in meningococcal sepsis. *Intensive care medicine*. 2006;32:1432-1437.
68. Rumbaut RE, Bellera RV, Randhawa JK, Shrimpton CN, Dasgupta SK, Dong JF, Burns AR. Endotoxin enhances microvascular thrombosis in mouse cremaster venules via a tlr4-dependent, neutrophil-independent mechanism. *American journal of physiology. Heart and circulatory physiology*. 2006;290:H1671-1679.
69. Camerer E, Cornelissen I, Kataoka H, Duong DN, Zheng YW, Coughlin SR. Roles of protease-activated receptors in a mouse model of endotoxemia. *Blood*. 2006;107:3912-3921.

70. Croner RS, Hoerer E, Kulu Y, Hackert T, Gebhard MM, Herfarth C, Klar E. Hepatic platelet and leukocyte adherence during endotoxemia. *Crit Care*. 2006;10:R15.
71. Kiefmann R, Heckel K, Schenkat S, Dorger M, Goetz AE. Role of p-selectin in platelet sequestration in pulmonary capillaries during endotoxemia. *Journal of vascular research*. 2006;43:473-481.
72. Pawlinski R, Wang JG, Owens AP, 3rd, Williams J, Antoniak S, Tencati M, Luther T, Rowley JW, Low EN, Weyrich AS, Mackman N. Hematopoietic and nonhematopoietic cell tissue factor activates the coagulation cascade in endotoxemic mice. *Blood*. 2010;116:806-814.
73. Sharron M, Hoptay CE, Wiles AA, Garvin LM, Geha M, Benton AS, Nagaraju K, Freishtat RJ. Platelets induce apoptosis during sepsis in a contact-dependent manner that is inhibited by gpiib/iiiA blockade. *PLoS one*. 2012;7:e41549.
74. Rogerson SJ, Grau GE, Hunt NH. The microcirculation in severe malaria. *Microcirculation*. 2004;11:559-576.
75. Faille D, El-Asaad F, Alessi MC, Fusai T, Combes V, Grau GE. Platelet-endothelial cell interactions in cerebral malaria: The end of a cordial understanding. *Thrombosis and haemostasis*. 2009;102:1093-1102.
76. Cox D, McConkey S. The role of platelets in the pathogenesis of cerebral malaria. *Cellular and molecular life sciences : CMLS*. 2010;67:557-568.
77. Gerardin P, Rogier C, Ka AS, Jouvencel P, Brousse V, Imbert P. Prognostic value of thrombocytopenia in african children with falciparum malaria. *The American journal of tropical medicine and hygiene*. 2002;66:686-691.
78. Grau GE, Mackenzie CD, Carr RA, Redard M, Pizzolato G, Allasia C, Cataldo C, Taylor TE, Molyneux ME. Platelet accumulation in brain microvessels in fatal pediatric cerebral malaria. *The Journal of infectious diseases*. 2003;187:461-466.
79. Pain A, Ferguson DJ, Kai O, Urban BC, Lowe B, Marsh K, Roberts DJ. Platelet-mediated clumping of plasmodium falciparum-infected erythrocytes is a common adhesive phenotype and is associated with severe malaria. *Proc Natl Acad Sci U S A*. 2001;98:1805-1810.
80. Wassmer SC, Taylor T, Maclennan CA, Kanjala M, Mukaka M, Molyneux ME, Grau GE. Platelet-induced clumping of plasmodium falciparum-infected erythrocytes from malawian patients with cerebral malaria-possible modulation in vivo by thrombocytopenia. *The Journal of infectious diseases*. 2008;197:72-78.
81. Wassmer SC, Lepolard C, Traore B, Pouvelle B, Gysin J, Grau GE. Platelets reorient plasmodium falciparum-infected erythrocyte cytoadhesion to activated endothelial cells. *The Journal of infectious diseases*. 2004;189:180-189.
82. Inyang AL, Sodeinde O, Okpako DT, Essien EM. Platelet reactions after interaction with cultured plasmodium falciparum infected erythrocytes. *Br J Haematol*. 1987;66:375-378.
83. Srivastava K, Cockburn IA, Swaim A, Thompson LE, Tripathi A, Fletcher CA, Shirk EM, Sun H, Kowalska MA, Fox-Talbot K, Sullivan D, Zavala F, Morrell CN. Platelet factor 4 mediates inflammation in experimental cerebral malaria. *Cell host & microbe*. 2008;4:179-187.
84. Francischetti IM, Seydel KB, Monteiro RQ, Whitten RO, Erexson CR, Noronha AL, Ostera GR, Kamiza SB, Molyneux ME, Ward JM, Taylor TE. Plasmodium falciparum-infected erythrocytes induce tissue factor expression in endothelial cells and support the assembly of multimolecular coagulation complexes. *Journal of thrombosis and haemostasis : JTH*. 2007;5:155-165.
85. Essien EM, Ebhota MI. Platelet secretory activities in acute malaria (plasmodium falciparum) infection. *Acta haematologica*. 1983;70:183-188.
86. Srivastava K, Field DJ, Aggrey A, Yamakuchi M, Morrell CN. Platelet factor 4 regulation of monocyte klf4 in experimental cerebral malaria. *PLoS one*. 2010;5:e10413.

87. de Souza JB, Hafalla JC, Riley EM, Couper KN. Cerebral malaria: Why experimental murine models are required to understand the pathogenesis of disease. *Parasitology*. 2010;137:755-772.
88. van der Heyde HC, Gramaglia I, Sun G, Woods C. Platelet depletion by anti-cd41 (alphaIIb) mab injection early but not late in the course of disease protects against plasmodium berghei pathogenesis by altering the levels of pathogenic cytokines. *Blood*. 2005;105:1956-1963.
89. von Zur Muhlen C, Sibson NR, Peter K, Campbell SJ, Wilainam P, Grau GE, Bode C, Choudhury RP, Anthony DC. A contrast agent recognizing activated platelets reveals murine cerebral malaria pathology undetectable by conventional mri. *J Clin Invest*. 2008;118:1198-1207.
90. Reis PA, Estado V, da Silva TI, d'Avila JC, Siqueira LD, Assis EF, Bozza PT, Bozza FA, Tibirica EV, Zimmerman GA, Castro-Faria-Neto HC. Statins decrease neuroinflammation and prevent cognitive impairment after cerebral malaria. *PLoS pathogens*. 2012;8:e1003099.
91. Basu A, Chaturvedi UC. Vascular endothelium: The battlefield of dengue viruses. *FEMS immunology and medical microbiology*. 2008;53:287-299.
92. Morens DM, Fauci AS. Dengue and hemorrhagic fever: A potential threat to public health in the united states. *JAMA : the journal of the American Medical Association*. 2008;299:214-216.
93. Schmidt AC. Response to dengue fever--the good, the bad, and the ugly? *N Engl J Med*. 2010;363:484-487.
94. Lee YR, Liu MT, Lei HY, Liu CC, Wu JM, Tung YC, Lin YS, Yeh TM, Chen SH, Liu HS. Mcp-1, a highly expressed chemokine in dengue haemorrhagic fever/dengue shock syndrome patients, may cause permeability change, possibly through reduced tight junctions of vascular endothelium cells. *The Journal of general virology*. 2006;87:3623-3630.
95. Bozza FA, Cruz OG, Zagne SM, Azeredo EL, Nogueira RM, Assis EF, Bozza PT, Kubelka CF. Multiplex cytokine profile from dengue patients: Mip-1beta and ifn-gamma as predictive factors for severity. *BMC infectious diseases*. 2008;8:86.
96. Ghosh K, Gangodkar S, Jain P, Shetty S, Ramjee S, Poddar P, Basu A. Imaging the interaction between dengue 2 virus and human blood platelets using atomic force and electron microscopy. *Journal of electron microscopy*. 2008;57:113-118.
97. Mendes-Ribeiro AC, Moss MB, Siqueira MA, Moraes TL, Ellory JC, Mann GE, Brunini TM. Dengue fever activates the l-arginine-nitric oxide pathway: An explanation for reduced aggregation of human platelets. *Clinical and experimental pharmacology & physiology*. 2008;35:1143-1146.
98. Souza DG, Fagundes CT, Sousa LP, Amaral FA, Souza RS, Souza AL, Kroon EG, Sachs D, Cunha FQ, Bukin E, Atrasheuskaya A, Ignatyev G, Teixeira MM. Essential role of platelet-activating factor receptor in the pathogenesis of dengue virus infection. *Proc Natl Acad Sci U S A*. 2009;106:14138-14143.
99. Groger M, Pasteiner W, Ignatyev G, Matt U, Knapp S, Atrasheuskaya A, Bukin E, Friedl P, Zinkl D, Hofer-Warbinek R, Zacharowski K, Petzelbauer P, Reingruber S. Peptide bbeta(15-42) preserves endothelial barrier function in shock. *PLoS one*. 2009;4:e5391.
100. Noisakran S, Gibbons RV, Songprakhon P, Jairungsri A, Ajariyakhajorn C, Nisalak A, Jarman RG, Malasit P, Chokephaibulkit K, Perng GC. Detection of dengue virus in platelets isolated from dengue patients. *The Southeast Asian journal of tropical medicine and public health*. 2009;40:253-262.
101. Onlamoon N, Noisakran S, Hsiao HM, Duncan A, Villinger F, Ansari AA, Perng GC. Dengue virus-induced hemorrhage in a nonhuman primate model. *Blood*. 2010;115:1823-1834.
102. Hottz E, Tolley ND, Zimmerman GA, Weyrich AS, Bozza FA. Platelets in dengue infection. *Drug Discovery Today: Disease Mechanisms*. 2011.



103. Matthay MA, Zimmerman GA. Acute lung injury and the acute respiratory distress syndrome: Four decades of inquiry into pathogenesis and rational management. *American journal of respiratory cell and molecular biology*. 2005;33:319-327.
104. Bozza FA, Shah AM, Weyrich AS, Zimmerman GA. Amicus or adversary: Platelets in lung biology, acute injury, and inflammation. *American journal of respiratory cell and molecular biology*. 2009;40:123-134.
105. Tabuchi A, Kuebler WM. Endothelium-platelet interactions in inflammatory lung disease. *Vascular pharmacology*. 2008;49:141-150.
106. Katz JN, Kolappa KP, Becker RC. Beyond thrombosis: The versatile platelet in critical illness. *Chest*. 2011;139:658-668.
107. Matthay MA, Ware LB, Zimmerman GA. The acute respiratory distress syndrome. *J Clin Invest*. 2012;122:2731-2740.
108. Hechtman HB, Lonergan EA, Shepro D. Platelet and leukocyte lung interactions in patients with respiratory failure. *Surgery*. 1978;83:155-163.
109. Schneider RC, Zapol WM, Carvalho AC. Platelet consumption and sequestration in severe acute respiratory failure. *Am Rev Respir Dis*. 1980;122:445-451.
110. Tvedten HW, Till GO, Ward PA. Mediators of lung injury in mice following systemic activation of complement. *Am J Pathol*. 1985;119:92-100.
111. Idell S, Maunder R, Fein AM, Switalska HI, Tuszyński GP, McLarty J, Niewiarowski S. Platelet-specific alpha-granule proteins and thrombospondin in bronchoalveolar lavage in the adult respiratory distress syndrome. *Chest*. 1989;96:1125-1132.
112. Cohen AB, Stevens MD, Miller EJ, Atkinson MA, Mullenbach G, Maunder RJ, Martin TR, Wiener-Kronish JP, Matthay MA. Neutrophil-activating peptide-2 in patients with pulmonary edema from congestive heart failure or ARDS. *The American journal of physiology*. 1993;264:L490-495.
113. Tweardy DJ, Khoshnevis MR, Yu B, Mastrangelo MA, Hardison EG, Lopez JA. Essential role for platelets in organ injury and inflammation in resuscitated hemorrhagic shock. *Shock*. 2006;26:386-390.
114. Zarbock A, Singbartl K, Ley K. Complete reversal of acid-induced acute lung injury by blocking of platelet-neutrophil aggregation. *J Clin Invest*. 2006;116:3211-3219.
115. Asaduzzaman M, Lavasani S, Rahman M, Zhang S, Braun OO, Jeppsson B, Thorlacius H. Platelets support pulmonary recruitment of neutrophils in abdominal sepsis. *Crit Care Med*. 2009;37:1389-1396.
116. Grommes J, Alard JE, Drechsler M, Wantha S, Morgelin M, Kuebler WM, Jacobs M, von Hundelshausen P, Markart P, Wygrecka M, Preissner KT, Hackeng TM, Koenen RR, Weber C, Soehnlein O. Disruption of platelet-derived chemokine heteromers prevents neutrophil extravasation in acute lung injury. *Am J Respir Crit Care Med*. 2012;185:628-636.
117. Yiming MT, Lederer DJ, Sun L, Huertas A, Issekutz AC, Bhattacharya S. Platelets enhance endothelial adhesiveness in high tidal volume ventilation. *American journal of respiratory cell and molecular biology*. 2008;39:569-575.
118. Emin MT, Sun L, Huertas A, Das S, Bhattacharya J, Bhattacharya S. Platelets induce endothelial tissue factor expression in a mouse model of acid-induced lung injury. *American journal of physiology. Lung cellular and molecular physiology*. 2012;302:L1209-1220.
119. Rondina MT, Brewster B, Grissom CK, Zimmerman GA, Kastendieck DH, Harris ES, Weyrich AS. In vivo platelet activation in critically ill patients with primary 2009 influenza A(H1N1). *Chest*. 2012;141:1490-1495.
120. Silliman CC, Bjornsen AJ, Wyman TH, Kelher M, Allard J, Bieber S, Voelkel NF. Plasma and lipids from stored platelets cause acute lung injury in an animal model. *Transfusion*. 2003;43:633-640.

121. Khan SY, Kelher MR, Heal JM, Blumberg N, Boshkov LK, Phipps R, Gettings KF, McLaughlin NJ, Silliman CC. Soluble cd40 ligand accumulates in stored blood components, primes neutrophils through cd40, and is a potential cofactor in the development of transfusion-related acute lung injury. *Blood*. 2006;108:2455-2462.
122. Looney MR, Nguyen JX, Hu Y, Van Ziffle JA, Lowell CA, Matthay MA. Platelet depletion and aspirin treatment protect mice in a two-event model of transfusion-related acute lung injury. *J Clin Invest*. 2009;119:3450-3461.
123. Hidalgo A, Chang J, Jang JE, Peired AJ, Chiang EY, Frenette PS. Heterotypic interactions enabled by polarized neutrophil microdomains mediate thromboinflammatory injury. *Nat Med*. 2009;15:384-391.
124. Vlaar AP, Hofstra JJ, Kulik W, van Lenthe H, Nieuwland R, Schultz MJ, Levi MM, Roelofs JJ, Tool AT, de Korte D, Juffermans NP. Supernatant of stored platelets causes lung inflammation and coagulopathy in a novel in vivo transfusion model. *Blood*. 2010;116:1360-1368.
125. Caudrillier A, Kessenbrock K, Gilliss BM, Nguyen JX, Marques MB, Monestier M, Toy P, Werb Z, Looney MR. Platelets induce neutrophil extracellular traps in transfusion-related acute lung injury. *J Clin Invest*. 2012;122:2661-2671.
126. Thomas GM, Carbo C, Curtis BR, Martinod K, Mazo IB, Schatzberg D, Cifuni SM, Fuchs TA, von Andrian UH, Hartwig JH, Aster RH, Wagner DD. Extracellular DNA traps are associated with the pathogenesis of trALI in humans and mice. *Blood*. 2012;119:6335-6343.
127. Libby P, Simon DI. Inflammation and thrombosis: The clot thickens. *Circulation*. 2001;103:1718-1720.
128. Fox EA, Kahn SR. The relationship between inflammation and venous thrombosis. A systematic review of clinical studies. *Thrombosis and haemostasis*. 2005;94:362-365.
129. Mackman N. New insights into the mechanisms of venous thrombosis. *J Clin Invest*. 2012;122:2331-2336.
130. Wakefield TW, Strieter RM, Wilke CA, Kadell AM, Wroblewski SK, Burdick MD, Schmidt R, Kunkel SL, Greenfield LJ. Venous thrombosis-associated inflammation and attenuation with neutralizing antibodies to cytokines and adhesion molecules. *Arteriosclerosis, thrombosis, and vascular biology*. 1995;15:258-268.
131. Murciano JC, Harshaw D, Neschis DG, Koniaris L, Bdeir K, Medinilla S, Fisher AB, Golden MA, Cines DB, Nakada MT, Muzykantov VR. Platelets inhibit the lysis of pulmonary microemboli. *American journal of physiology. Lung cellular and molecular physiology*. 2002;282:L529-539.
132. Wahrenbrock M, Borsig L, Le D, Varki N, Varki A. Selectin-mucin interactions as a probable molecular explanation for the association of trosseau syndrome with mucinous adenocarcinomas. *J Clin Invest*. 2003;112:853-862.
133. Inami N, Nomura S, Kikuchi H, Kajiura T, Yamada K, Nakamori H, Takahashi N, Tsuda N, Hikosaka M, Masaki M, Iwasaka T. P-selectin and platelet-derived microparticles associated with monocyte activation markers in patients with pulmonary embolism. *Clinical and applied thrombosis/hemostasis : official journal of the International Academy of Clinical and Applied Thrombosis/Hemostasis*. 2003;9:309-316.
134. Chirinos JA, Heresi GA, Velasquez H, Jy W, Jimenez JJ, Ahn E, Horstman LL, Soriano AO, Zambrano JP, Ahn YS. Elevation of endothelial microparticles, platelets, and leukocyte activation in patients with venous thromboembolism. *Journal of the American College of Cardiology*. 2005;45:1467-1471.
135. Prescott SM, Weyrich AS, Zimmerman GA. Classification of venous thromboembolism (vte). The clot is hot: Inflammation, myeloid leukocytes, and venous thromboembolism. *Journal of thrombosis and haemostasis : JTH*. 2005;3:2571-2573.

136. Anthoni C, Russell J, Wood KC, Stokes KY, Vowinkel T, Kirchhofer D, Granger DN. Tissue factor: A mediator of inflammatory cell recruitment, tissue injury, and thrombus formation in experimental colitis. *J Exp Med.* 2007;204:1595-1601.
137. Massberg S, Grahl L, von Bruehl ML, Manukyan D, Pfeiler S, Goosmann C, Brinkmann V, Lorenz M, Bidzhekov K, Khandagale AB, Konrad I, Kennerknecht E, Reges K, Holdenrieder S, Braun S, Reinhardt C, Spannagl M, Preissner KT, Engelmann B. Reciprocal coupling of coagulation and innate immunity via neutrophil serine proteases. *Nat Med.* 2010;16:887-896.
138. von Bruhl ML, Stark K, Steinhart A, Chandraratne S, Konrad I, Lorenz M, Khandoga A, Tirniceriu A, Coletti R, Kollnberger M, Byrne RA, Laitinen I, Walch A, Brill A, Pfeiler S, Manukyan D, Braun S, Lange P, Riegger J, Ware J, Eckart A, Haidari S, Rudelius M, Schulz C, Echtler K, Brinkmann V, Schwaiger M, Preissner KT, Wagner DD, Mackman N, Engelmann B, Massberg S. Monocytes, neutrophils, and platelets cooperate to initiate and propagate venous thrombosis in mice in vivo. *J Exp Med.* 2012;209:819-835.
139. Rondina MT, Lam UT, Pendleton RC, Kraiss LW, Wanner N, Zimmerman GA, Hoffman JM, Hanrahan C, Boucher K, Christian PE, Butterfield RI, Morton KA. (18)f-dg pet in the evaluation of acuity of deep vein thrombosis. *Clinical nuclear medicine.* 2012;37:1139-1145.
140. Browne PV, Mosher DF, Steinberg MH, Heibel RP. Disturbance of plasma and platelet thrombospondin levels in sickle cell disease. *Am J Hematol.* 1996;51:296-301.
141. Beurling-Harbury C, Schade SG. Platelet activation during pain crisis in sickle cell anemia patients. *Am J Hematol.* 1989;31:237-241.
142. Brittain HA, Eckman JR, Swerlick RA, Howard RJ, Wick TM. Thrombospondin from activated platelets promotes sickle erythrocyte adherence to human microvascular endothelium under physiologic flow: A potential role for platelet activation in sickle cell vaso-occlusion. *Blood.* 1993;81:2137-2143.
143. Kaul DK, Heibel RP. Hypoxia/reoxygenation causes inflammatory response in transgenic sickle mice but not in normal mice. *J Clin Invest.* 2000;106:411-420.
144. Turhan A, Weiss LA, Mohandas N, Collier BS, Frenette PS. Primary role for adherent leukocytes in sickle cell vascular occlusion: A new paradigm. *Proc Natl Acad Sci U S A.* 2002;99:3047-3051.
145. Frenette PS. Sickle cell vaso-occlusion: Multistep and multicellular paradigm. *Curr Opin Hematol.* 2002;9:101-106.
146. Holtzclaw JD, Jack D, Aguayo SM, Eckman JR, Roman J, Hsu LL. Enhanced pulmonary and systemic response to endotoxin in transgenic sickle mice. *Am J Respir Crit Care Med.* 2004;169:687-695.
147. Raghavachari N, Xu X, Harris A, Villagra J, Logun C, Barb J, Solomon MA, Suffredini AF, Danner RL, Kato G, Munson PJ, Morris SM, Jr., Gladwin MT. Amplified expression profiling of platelet transcriptome reveals changes in arginine metabolic pathways in patients with sickle cell disease. *Circulation.* 2007;115:1551-1562.
148. Polanowska-Grabowska R, Wallace K, Field JJ, Chen L, Marshall MA, Figler R, Gear AR, Linden J. P-selectin-mediated platelet-neutrophil aggregate formation activates neutrophils in mouse and human sickle cell disease. *Arteriosclerosis, thrombosis, and vascular biology.* 2010;30:2392-2399.
149. Wang L, Erling P, Bengtsson AA, Truedsson L, Sturfelt G, Erlinge D. Transcriptional down-regulation of the platelet adp receptor p2y(12) and clusterin in patients with systemic lupus erythematosus. *Journal of thrombosis and haemostasis : JTH.* 2004;2:1436-1442.
150. Szekanecz Z, Koch AE. Vascular involvement in rheumatic diseases: 'Vascular rheumatology'. *Arthritis research & therapy.* 2008;10:224.
151. Solanilla A, Villeneuve J, Auguste P, Hugues M, Alioum A, Lepreux S, Ducroix JP, Duhaut P, Conri C, Viallard JF, Nurden AT, Constans J, Ripoché J. The transport of high amounts of vascular

- endothelial growth factor by blood platelets underlines their potential contribution in systemic sclerosis angiogenesis. *Rheumatology (Oxford)*. 2009;48:1036-1044.
152. Duffau P, Seneschal J, Nicco C, Richez C, Lazaro E, Douchet I, Bordes C, Viillard JF, Goulvestre C, Pellegrin JL, Weil B, Moreau JF, Batteux F, Blanco P. Platelet cd154 potentiates interferon-alpha secretion by plasmacytoid dendritic cells in systemic lupus erythematosus. *Science translational medicine*. 2010;2:47ra63.
  153. Lood C, Amisten S, Gullstrand B, Jonsen A, Allhorn M, Truedsson L, Sturfelt G, Erlinge D, Bengtsson AA. Platelet transcriptional profile and protein expression in patients with systemic lupus erythematosus: Up-regulation of the type i interferon system is strongly associated with vascular disease. *Blood*. 2010;116:1951-1957.
  154. Dees C, Akhmetshina A, Zerr P, Reich N, Palumbo K, Horn A, Jungel A, Beyer C, Kronke G, Zwerina J, Reiter R, Alenina N, Maroteaux L, Gay S, Schett G, Distler O, Distler JH. Platelet-derived serotonin links vascular disease and tissue fibrosis. *J Exp Med*. 2011;208:961-972.
  155. Tomasson G, Lavalley M, Tanriverdi K, Finkielman JD, Davis JC, Jr., Hoffman GS, McCune WJ, St Clair EW, Specks U, Spiera R, Stone JH, Freedman JE, Merkel PA. Relationship between markers of platelet activation and inflammation with disease activity in wegener's granulomatosis. *The Journal of rheumatology*. 2011;38:1048-1054.
  156. Aksu K, Donmez A, Keser G. Inflammation-induced thrombosis: Mechanisms, disease associations and management. *Current pharmaceutical design*. 2012;18:1478-1493.
  157. Cloutier N, Pare A, Farndale RW, Schumacher HR, Nigrovic PA, Lacroix S, Boilard E. Platelets can enhance vascular permeability. *Blood*. 2012;120:1334-1343.
  158. Fernandez Bello I, Alvarez MT, Lopez-Longo FJ, Arias-Salgado EG, Martin M, Jimenez-Yuste V, Rodriguez de la Rua A, Butta NV. Platelet soluble cd40l and matrix metalloproteinase 9 activity are proinflammatory mediators in behcet disease patients. *Thrombosis and haemostasis*. 2012;107:88-98.
  159. Baldwin WM, 3rd, Kuo HH, Morrell CN. Platelets: Versatile modifiers of innate and adaptive immune responses to transplants. *Current opinion in organ transplantation*. 2010
  160. Meehan SM, Limsrichamrern S, Manaligod JR, Junsanto T, Josephson MA, Thistlethwaite JR, Haas M. Platelets and capillary injury in acute humoral rejection of renal allografts. *Human pathology*. 2003;34:533-540.
  161. Xu H, Zhang X, Mannon RB, Kirk AD. Platelet-derived or soluble cd154 induces vascularized allograft rejection independent of cell-bound cd154. *J Clin Invest*. 2006;116:769-774.
  162. Morrell CN, Murata K, Swaim AM, Mason E, Martin TV, Thompson LE, Ballard M, Fox-Talbot K, Wasowska B, Baldwin WM, 3rd. In vivo platelet-endothelial cell interactions in response to major histocompatibility complex alloantibody. *Circulation research*. 2008;102:777-785.
  163. Lin CC, Ezzelarab M, Shapiro R, Ekser B, Long C, Hara H, Echeverri G, Torres C, Watanabe H, Ayares D, Dorling A, Cooper DK. Recipient tissue factor expression is associated with consumptive coagulopathy in pig-to-primate kidney xenotransplantation. *American journal of transplantation : official journal of the American Society of Transplantation and the American Society of Transplant Surgeons*. 2010;10:1556-1568.
  164. Lievens D, von Hundelshausen P. Platelets in atherosclerosis. *Thrombosis and haemostasis*. 2011;106:827-838.
  165. Steg PG, Dorman SH, Amarenco P. Atherothrombosis and the role of antiplatelet therapy. *Journal of thrombosis and haemostasis : JTH*. 2011;9 Suppl 1:325-332.
  166. Langer HF, Geisler T, Gawaz M. Atherothrombosis and coronary artery disease. In: Michelson A, ed. *Platelets, 3rd edition*. London: Elsevier; 2013: 653-668.
  167. FitzGerald GA, Smith B, Pedersen AK, Brash AR. Increased prostacyclin biosynthesis in patients with severe atherosclerosis and platelet activation. *N Engl J Med*. 1984;310:1065-1068.

168. von Hundelshausen P, Weber KS, Huo Y, Proudfoot AE, Nelson PJ, Ley K, Weber C. Rantes deposition by platelets triggers monocyte arrest on inflamed and atherosclerotic endothelium. *Circulation*. 2001;103:1772-1777.
169. Massberg S, Brand K, Gruner S, Page S, Muller E, Muller I, Bergmeier W, Richter T, Lorenz M, Konrad I, Nieswandt B, Gawaz M. A critical role of platelet adhesion in the initiation of atherosclerotic lesion formation. *J Exp Med*. 2002;196:887-896.
170. Burger PC, Wagner DD. Platelet p-selectin facilitates atherosclerotic lesion development. *Blood*. 2003;101:2661-2666.
171. Huo Y, Schober A, Forlow SB, Smith DF, Hyman MC, Jung S, Littman DR, Weber C, Ley K. Circulating activated platelets exacerbate atherosclerosis in mice deficient in apolipoprotein e. *Nat Med*. 2003;9:61-67.
172. Schober A, Zerneck A, Liehn EA, von Hundelshausen P, Knarren S, Kuziel WA, Weber C. Crucial role of the ccl2/ccr2 axis in neointimal hyperplasia after arterial injury in hyperlipidemic mice involves early monocyte recruitment and ccl2 presentation on platelets. *Circulation research*. 2004;95:1125-1133.
173. Podrez EA, Byzova TV, Febbraio M, Salomon RG, Ma Y, Valiyaveetil M, Poliakov E, Sun M, Finton PJ, Curtis BR, Chen J, Zhang R, Silverstein RL, Hazen SL. Platelet cd36 links hyperlipidemia, oxidant stress and a prothrombotic phenotype. *Nat Med*. 2007;13:1086-1095.
174. Koenen RR, von Hundelshausen P, Nesmelova IV, Zerneck A, Liehn EA, Sarabi A, Kramp BK, Piccinini AM, Paludan SR, Kowalska MA, Kungl AJ, Hackeng TM, Mayo KH, Weber C. Disrupting functional interactions between platelet chemokines inhibits atherosclerosis in hyperlipidemic mice. *Nat Med*. 2009;15:97-103.
175. Daub K, Seizer P, Stellos K, Kramer BF, Bigalke B, Schaller M, Fateh-Moghadam S, Gawaz M, Lindemann S. Oxidized ldl-activated platelets induce vascular inflammation. *Seminars in thrombosis and hemostasis*. 2010;36:146-156.
176. Lievens D, Zerneck A, Seijkens T, Soehnlein O, Beckers L, Munnix IC, Wijnands E, Goossens P, van Kruchten R, Thevissen L, Boon L, Flavell RA, Noelle RJ, Gerdes N, Biessen EA, Daemen MJ, Heemskerk JW, Weber C, Lutgens E. Platelet cd40l mediates thrombotic and inflammatory processes in atherosclerosis. *Blood*. 2010;116:4317-4327.
177. Davi G, Santilli F, Vazzana N. Diabetes mellitus. In: Michelson A, ed. *Platelets, 3rd edition*. London: Elsevier; 2013: 711-732.
178. Lehr HA, Weyrich AS, Saetzler RK, Jurek A, Arfors KE, Zimmerman GA, Prescott SM, McIntyre TM. Vitamin c blocks inflammatory platelet-activating factor mimetics created by cigarette smoking. *J Clin Invest*. 1997;99:2358-2364.
179. Mickelson JK, Lakkis NM, Villarreal-Levy G, Hughes BJ, Smith CW. Leukocyte activation with platelet adhesion after coronary angioplasty: A mechanism for recurrent disease? *Journal of the American College of Cardiology*. 1996;28:345-353.
180. Neumann FJ, Marx N, Gawaz M, Brand K, Ott I, Rokitta C, Sticherling C, Meinel C, May A, Schomig A. Induction of cytokine expression in leukocytes by binding of thrombin-stimulated platelets. *Circulation*. 1997;95:2387-2394.
181. Neumann FJ, Zohlnhofer D, Fakhoury L, Ott I, Gawaz M, Schomig A. Effect of glycoprotein iib/iiia receptor blockade on platelet-leukocyte interaction and surface expression of the leukocyte integrin mac-1 in acute myocardial infarction. *Journal of the American College of Cardiology*. 1999;34:1420-1426.
182. Furman MI, Barnard MR, Krueger LA, Fox ML, Shilale EA, Lessard DM, Marchese P, Frelinger AL, 3rd, Goldberg RJ, Michelson AD. Circulating monocyte-platelet aggregates are an early marker of acute myocardial infarction. *Journal of the American College of Cardiology*. 2001;38:1002-1006.

183. Michelson AD, Barnard MR, Krueger LA, Valeri CR, Furman MI. Circulating monocyte-platelet aggregates are a more sensitive marker of in vivo platelet activation than platelet surface p-selectin: Studies in baboons, human coronary intervention, and human acute myocardial infarction. *Circulation*. 2001;104:1533-1537.
184. Sarma J, Laan CA, Alam S, Jha A, Fox KA, Dransfield I. Increased platelet binding to circulating monocytes in acute coronary syndromes. *Circulation*. 2002;105:2166-2171.
185. Freedman JE, Loscalzo J. Platelet-monocyte aggregates: Bridging thrombosis and inflammation. *Circulation*. 2002;105:2130-2132.
186. Palmerini T, Nedelman MA, Scudder LE, Nakada MT, Jordan RE, Smyth S, Gordon RE, Fallon JT, Collier BS. Effects of abciximab on the acute pathology of blood vessels after arterial stenting in nonhuman primates. *Journal of the American College of Cardiology*. 2002;40:360-366.
187. Welt FG, Rogers C. Inflammation and restenosis in the stent era. *Arteriosclerosis, thrombosis, and vascular biology*. 2002;22:1769-1776.
188. Healy AM, Pickard MD, Pradhan AD, Wang Y, Chen Z, Croce K, Sakuma M, Shi C, Zago AC, Garasic J, Damokosh AI, Dowie TL, Poisson L, Lillie J, Libby P, Ridker PM, Simon DI. Platelet expression profiling and clinical validation of myeloid-related protein-14 as a novel determinant of cardiovascular events. *Circulation*. 2006;113:2278-2284.
189. Zhang SZ, Jin YP, Qin GM, Wang JH. Association of platelet-monocyte aggregates with platelet activation, systemic inflammation, and myocardial injury in patients with non-ST elevation acute coronary syndromes. *Clinical cardiology*. 2007;30:26-31.
190. Mackman N. Triggers, targets and treatments for thrombosis. *Nature*. 2008;451:914-918.
191. Martin JF, Kristensen SD, Mathur A, Grove EL, Choudry FA. The causal role of megakaryocyte-platelet hyperactivity in acute coronary syndromes. *Nature reviews. Cardiology*. 2012;9:658-670.
192. Grau AJ, Ruf A, Vogt A, Lichy C, Buggle F, Patscheke H, Hacke W. Increased fraction of circulating activated platelets in acute and previous cerebrovascular ischemia. *Thrombosis and haemostasis*. 1998;80:298-301.
193. van Kooten F, Ciabattini G, Koudstaal PJ, Dippel DW, Patrono C. Increased platelet activation in the chronic phase after cerebral ischemia and intracerebral hemorrhage. *Stroke; a journal of cerebral circulation*. 1999;30:546-549.
194. Zeller JA, Tschoepe D, Kessler C. Circulating platelets show increased activation in patients with acute cerebral ischemia. *Thrombosis and haemostasis*. 1999;81:373-377.
195. Galt SW, Lindemann S, Medd D, Allen LL, Kraiss LW, Harris ES, Prescott SM, McIntyre TM, Weyrich AS, Zimmerman GA. Differential regulation of matrix metalloproteinase-9 by monocytes adherent to collagen and platelets. *Circulation research*. 2001;89:509-516.
196. Zhang ZG, Zhang L, Tsang W, Goussev A, Powers C, Ho KL, Morris D, Smyth SS, Collier BS, Chopp M. Dynamic platelet accumulation at the site of the occluded middle cerebral artery and in downstream microvessels is associated with loss of microvascular integrity after embolic middle cerebral artery occlusion. *Brain research*. 2001;912:181-194.
197. Garlich CD, Kozina S, Fateh-Moghadam S, Handschu R, Tomandl B, Stumpf C, Eskafi S, Raaz D, Schmeisser A, Yilmaz A, Ludwig J, Neundorfer B, Daniel WG. Upregulation of cd40-cd40 ligand (cd154) in patients with acute cerebral ischemia. *Stroke; a journal of cerebral circulation*. 2003;34:1412-1418.
198. Novo S, Basili S, Tantillo R, Falco A, Davi V, Novo G, Corrado E, Davi G. Soluble cd40l and cardiovascular risk in asymptomatic low-grade carotid stenosis. *Stroke; a journal of cerebral circulation*. 2005;36:673-675.
199. Weyrich AS, Denis MM, Kuhlmann-Eyre JR, Spencer ED, Dixon DA, Marathe GK, McIntyre TM, Zimmerman GA, Prescott SM. Dipyridamole selectively inhibits inflammatory gene expression in platelet-monocyte aggregates. *Circulation*. 2005;111:633-642.

200. Zeller JA, Lenz A, Eschenfelder CC, Zunker P, Deuschl G. Platelet-leukocyte interaction and platelet activation in acute stroke with and without preceding infection. *Arteriosclerosis, thrombosis, and vascular biology*. 2005;25:1519-1523.
201. Htun P, Fateh-Moghadam S, Tomandl B, Handschu R, Klinger K, Stellos K, Garlichs C, Daniel W, Gawaz M. Course of platelet activation and platelet-leukocyte interaction in cerebrovascular ischemia. *Stroke; a journal of cerebral circulation*. 2006;37:2283-2287.
202. Massberg S, Schurzinger K, Lorenz M, Konrad I, Schulz C, Plesnila N, Kennerknecht E, Rudelius M, Sauer S, Braun S, Kremmer E, Emambokus NR, Frampton J, Gawaz M. Platelet adhesion via glycoprotein iib integrin is critical for atheroprogession and focal cerebral ischemia: An in vivo study in mice lacking glycoprotein iib. *Circulation*. 2005;112:1180-1188.
203. Freedman JE, Vitseva O, Tanriverdi K. The role of the blood transcriptome in innate inflammation and stroke. *Annals of the New York Academy of Sciences*. 2010;1207:41-45.
204. Thornton P, McColl BW, Greenhalgh A, Denes A, Allan SM, Rothwell NJ. Platelet interleukin-1alpha drives cerebrovascular inflammation. *Blood*. 2010;115:3632-3639.
205. Lukasik M, Dworacki G, Kufel-Grabowska J, Watala C, Kozubski W. Upregulation of cd40 ligand and enhanced monocyte-platelet aggregate formation are associated with worse clinical outcome after ischaemic stroke. *Thrombosis and haemostasis*. 2012;107:346-355.
206. del Zoppo GJ. Central nervous system ischemia. In: Michelson A, ed. *Platelets, 3rd edition*. London: Elsevier; 2013: 669-698.
207. Sobel M. Peripheral vascular disease. In: Michelson A, ed. *Platelets, 3rd edition*. London: Elsevier; 2013: 699-710.
208. Burdess A, Michelsen AE, Brosstad F, Fox KA, Newby DE, Nimmo AF. Platelet activation in patients with peripheral vascular disease: Reproducibility and comparability of platelet markers. *Thrombosis research*. 2012;129:50-55.
209. Olin JW, Shih A. Thromboangiitis obliterans (buerger's disease). *Current opinion in rheumatology*. 2006;18:18-24.
210. Espinoza LR. Buerger's disease: Thromboangiitis obliterans 100 years after the initial description. *The American journal of the medical sciences*. 2009;337:285-286.
211. Carr ME, Jr., Hackney MH, Hines SJ, Hedding SP, Carr SL, Martin EJ. Enhanced platelet force development despite drug-induced inhibition of platelet aggregation in patients with thromboangiitis obliterans--two case reports. *Vascular and endovascular surgery*. 2002;36:473-480.
212. Darnige L, Helley D, Fischer AM, Emmerich J, Smadja DM, Fiessinger JN. Platelet microparticle levels: A biomarker of thromboangiitis obliterans (buerger's disease) exacerbation. *Journal of cellular and molecular medicine*. 2010;14:449-451.
213. Lehr HA. Microcirculatory dysfunction induced by cigarette smoking. *Microcirculation*. 2000;7:367-384.
214. Harding SA, Sarma J, Josephs DH, Cruden NL, Din JN, Twomey PJ, Fox KA, Newby DE. Upregulation of the cd40/cd40 ligand dyad and platelet-monocyte aggregation in cigarette smokers. *Circulation*. 2004;109:1926-1929.
